# Supplementary material
Source: HighWire-hosted journal article supplement (https://cmaj.ca/highwire/filestream/76672/field_highwire_adjunct_files/0/200191-res-1-at.pdf)
Supplement: 200191-res-1-at.pdf [file 200191-res-1-at.pdf]

## Appendix 1 (as supplied by the authors)

| Substances assessed on toxicology and corresponding generic medications |                       |                             |       |
|-------------------------------------------------------------------------|-----------------------|-----------------------------|-------|
| Substance                                                               | Class                 | Matched Pharnanet substance | Notes |
| 11-Carboxytetrahydrocannabinol                                          | Cannabinoid           |                             |       |
| 3-METHYLFENTANYL                                                        | Opioid                |                             |       |
| 6-Monoacetylmorphine (Heroin metabolite)                                | Opioid                | DIACETYLMORPHINE            |       |
| 9-Hydroxyrisperidone                                                    | Antipsychotic         | PALIPERIDONE                |       |
| Acetaminophen                                                           | Other                 |                             |       |
| Acetylfentanyl                                                          | Opioid                |                             |       |
| Alprazolam                                                              | Benzodiazepine/z-drug | ALPRAZOLAM                  |       |
| Aminoclonazepam                                                         | Benzodiazepine/z-drug | CLONAZEPAM                  |       |
| Amiodarone                                                              | Other                 |                             |       |
| Amitriptylin                                                            | Antidepressant        | AMITRIPTYLINE               |       |
| Amlodipine                                                              | Other                 |                             |       |
| Amphetamines                                                            | Stimulant             | DEXTROAMPHETAMINE           |       |
| Aripiprazole                                                            | Antipsychotic         | ARIPIPRAZOLE                |       |
| Benzodiazepine                                                          | Benzodiazepine/z-drug |                             |       |
| Benzoylcegonine                                                         | Stimulant             |                             |       |
| Buprenorphine                                                           | Opioid                | BUPRENORPHINE               |       |
| Bupropion                                                               | Antidepressant        | BUPROPION                   |       |
| Cannabinoids                                                            | Cannabinoid           |                             |       |
| Carbamazepine                                                           | Other                 | CARBAMAZEPINE               |       |
| Carfentanil                                                             | Opioid                |                             |       |
| Chlorpheniramine (Chlor-Trimeton)                                       | Over-the-counter      |                             |       |
| Citalopram                                                              | Antidepressant        | CITALOPRAM                  |       |
| Clomipramine                                                            | Antidepressant        | CLOMIPRAMINE                |       |
| Clonazepam                                                              | Benzodiazepine/z-drug | CLONAZEPAM                  |       |
| Clozapine                                                               | Antipsychotic         |                             |       |
| Cocaethylene                                                            | Stimulant             |                             |       |
| Cocaine                                                                 | Stimulant             |                             |       |
| Codeine                                                                 | Opioid                | CODEINE                     |       |
| Cyclobenzaprine                                                         | Other                 | CYCLOBENZAPRINE             |       |
| Cyclopropyl Fentanyl                                                    | Opioid                |                             |       |
| Desmethyldiazepam (Valium Metabolite)                                   | Benzodiazepine/z-drug | DIAZEPAM                    |       |
| Desmethylvenlafaxine                                                    | Antidepressant        |                             |       |
| Dextromethorphan                                                        | Over-the-counter      |                             |       |
| Diazepam                                                                | Benzodiazepine/z-drug | DIAZEPAM                    |       |
| Diphenhydramine                                                         | Over-the-counter      |                             |       |
| Duloxetine                                                              | Antidepressant        | DULOXETINE                  |       |
| EDDP=Methadone Metabolite                                               | Opioid                | METHADONE                   |       |
| Ephedrine                                                               | Stimulant             |                             |       |
| Escitalopram                                                            | Antidepressant        | CITALOPRAM                  |       |
| Ethyl Alcohol                                                           | Alcohol               |                             |       |
| Fentanyl                                                                | Opioid                | FENTANYL                    |       |
| Fluoxetine                                                              | Antidepressant        | FLUOXETINE                  |       |
| Flupenthixol                                                            | Antipsychotic         | FLUPENTIXOL                 |       |
| Furanylfentanyl                                                         | Opioid                |                             |       |
| Gabapentin                                                              | Gabapentinoid         | GABAPENTIN                  |       |

|                                       |                       |                   |                                                                                                                 |
|---------------------------------------|-----------------------|-------------------|-----------------------------------------------------------------------------------------------------------------|
| Gamma-Hydroxybutrate                  | Other                 |                   |                                                                                                                 |
| HYDROXYZINE                           | Other                 |                   |                                                                                                                 |
| Haloperidol                           | Antipsychotic         | HALOPERIDOL       |                                                                                                                 |
| Hydromorphone                         | Opioid                | HYDROMORPHONE     |                                                                                                                 |
| Hydroxybupropion                      | Antidepressant        | BUPROPION         |                                                                                                                 |
| Ketamine                              | Other                 |                   |                                                                                                                 |
| Lamotrigine                           | Other                 | LAMOTRIGINE       |                                                                                                                 |
| Lidocaine                             | Other                 |                   |                                                                                                                 |
| Lorazepam                             | Benzodiazepine/z-drug | LORAZEPAM         |                                                                                                                 |
| Loxapine                              | Antipsychotic         | LOXAPINE          |                                                                                                                 |
| Lysergic Acid Diethylamide            | Other                 |                   |                                                                                                                 |
| MDA 3,4-Methylenedioxyamphetamine     | Other                 |                   |                                                                                                                 |
| MDMA<br>METHYLENEDIOXYMETHAMPHETAMINE | Other                 |                   |                                                                                                                 |
| MITRAGYNINE                           | Opioid                |                   |                                                                                                                 |
| Meperidine                            | Opioid                | MEPERIDINE        |                                                                                                                 |
| Methadone                             | Opioid                | METHADONE         |                                                                                                                 |
| Methamphetamine                       | Stimulant             |                   |                                                                                                                 |
| Methocarbamol                         | Other                 | METHOCARBAMOL     |                                                                                                                 |
| Methotrimeprazine                     | Antipsychotic         | METHOTRIMEPRAZINE |                                                                                                                 |
| Methoxphenidine                       | Other                 |                   |                                                                                                                 |
| Methylone                             | Other                 |                   |                                                                                                                 |
| Metoclopramide                        | Other                 |                   |                                                                                                                 |
| Mirtazapine                           | Antidepressant        | MIRTAZAPINE       |                                                                                                                 |
|                                       |                       |                   | Codeine<br>and<br>morphine<br>on<br>toxicology<br>matched<br>to<br>prescribed<br>codeine,<br>not to<br>morphine |
| Morphine                              | Opioid                | MORPHINE          |                                                                                                                 |
| Naproxen                              | Other                 |                   |                                                                                                                 |
| Norfentanyl                           | Opioid                | FENTANYL          |                                                                                                                 |
| Norfluoxetine                         | Antidepressant        | FLUOXETINE        |                                                                                                                 |
| Nortriptyline                         | Antidepressant        | NORTRIPTYLINE     |                                                                                                                 |
| Olanzapine                            | Antipsychotic         | OLANZAPINE        |                                                                                                                 |
| Other                                 | Other                 |                   |                                                                                                                 |
| Oxazepam                              | Benzodiazepine/z-drug | OXAZEPAM          |                                                                                                                 |
| Oxycodone                             | Opioid                | OXYCODONE         |                                                                                                                 |
| Paroxetine                            | Antidepressant        | PAROXETINE        |                                                                                                                 |
| Phencyclidine                         | Other                 |                   |                                                                                                                 |
| Phenobarbital                         | Other                 | PHENOBARBITAL     |                                                                                                                 |
| Pseudoephedrine                       | Stimulant             |                   |                                                                                                                 |
| Quetiapine                            | Antipsychotic         | QUETIAPINE        |                                                                                                                 |
| Risperidone                           | Antipsychotic         | RISPERIDONE       |                                                                                                                 |
| Rocuronium                            | Other                 |                   |                                                                                                                 |

|                       |                       |                                |  |
|-----------------------|-----------------------|--------------------------------|--|
| Salicyclate           | Other                 |                                |  |
| Sertraline            | Antidepressant        | <a href="#">SERTRALINE</a>     |  |
| Temazepam             | Benzodiazepine/z-drug | <a href="#">TEMAZEPAM</a>      |  |
| Tetrahydrocannabinol  | Cannabinoid           |                                |  |
| Topiramate            | Other                 | <a href="#">TOPIRAMATE</a>     |  |
| TRAMADOL              | Opioid                | <a href="#">TRAMADOL</a>       |  |
| Trazadone/Trazodone   | Antidepressant        | <a href="#">TRAZODONE</a>      |  |
| Valproic Acid         | Other                 | <a href="#">VALPROIC ACID</a>  |  |
| Venlafaxine (Effexor) | Antidepressant        | <a href="#">VENLAFAXINE</a>    |  |
| Verapamil             | Other                 |                                |  |
| W-18                  | Other                 |                                |  |
| Zopiclone             | Benzodiazepine/z-drug | <a href="#">ZOPICLONE</a>      |  |
| Zuclopenthixol        | Antipsychotic         | <a href="#">ZUCLOPENTHIXOL</a> |  |

### ICD9/10 codes used to derive mental diagnoses

| Diagnosis                      | ICD9 codes                                                           | ICD10 codes                                                 | Algorithm                                                        |
|--------------------------------|----------------------------------------------------------------------|-------------------------------------------------------------|------------------------------------------------------------------|
| <b>Mental health</b>           |                                                                      |                                                             |                                                                  |
| Substance use disorder         | 292<br>304<br>305 (excluding 305.0)                                  | F11<br>F12<br>F13<br>F14<br>F15<br>F16<br>F17<br>F18<br>F19 | Either: 2 family physician visits or 1 hospitalization in 1 year |
| Alcohol use disorder           | 291<br>303<br>305.0                                                  | F10                                                         | Either: 2 family physician visits or 1 hospitalization in 1 year |
| Depression                     | 300.4<br>311<br>50B (also requires another code to qualify)          | F32<br>F33<br>F34.1                                         | Either: 2 family physician visits or 1 hospitalization in 1 year |
| Anxiety                        | 300 (excluding 300.4)<br>50B (also requires another code to qualify) | F40<br>F41                                                  | Either: 2 family physician visits or 1 hospitalization in 1 year |
| Stress and adjustment disorder | 308<br>309                                                           | F43                                                         | Either: 2 family physician visits or 1 hospitalization in 1 year |

|                       |                   |                                                      |                                                                  |
|-----------------------|-------------------|------------------------------------------------------|------------------------------------------------------------------|
| Schizophrenia         | 295<br>297<br>298 | F20<br>F21<br>F22<br>F23<br>F24<br>F25<br>F28<br>F29 | Either: 2 family physician visits or 1 hospitalization in 1 year |
| Bipolar disorder      | 296               | F30<br>F31<br>F34 (excluding F34.1)<br>F38<br>F39    | Either: 2 family physician visits or 1 hospitalization in 1 year |
| Personality disorders | 301               | F60<br>F61<br>F69                                    | Either: 2 family physician visits or 1 hospitalization in 1 year |

### Medications by class in prescription history

#### *Opioids*

anileridine  
 buprenorphine  
 butorphanol  
 codeine  
 diamorphine  
 fentanyl  
 hydrocodone  
 hydromorphone  
 levorphanol  
 meperidine  
 methadone  
 morphine  
 oxycodone  
 oxymorphone  
 pentazocine  
 propoxyphene  
 tapentadol  
 tramadol

#### *Antidepressants*

amitriptyline  
 amoxapine

bupropion  
citalopram  
clomipramine  
desipramine  
desvenlafaxine  
doxepin  
duloxetine  
escitalopram  
fluoxetine  
fluvoxamine  
imipramine  
isocarboxazid  
levomilnacipran  
maprotiline  
mirtazapine  
moclobemide  
nefazodone  
nomifensine  
nortriptyline  
paroxetine  
phenelzine  
protriptyline  
sertraline  
tranylcypromine  
trazodone  
trimipramine  
tryptophan  
venlafaxine  
vilazodone  
vortioxetine

#### *Antipsychotics*

aripiprazole  
asenapine  
butaperazine  
chlorpromazine  
chlorprothixene  
clozapine  
flupentixol  
fluphenazine  
fluspirilene  
haloperidol  
loxapine  
lurasidone  
mesoridazine  
methotrimeprazine

olanzapine  
paliperidone  
periciazine  
perphenazine  
pimozide  
piperacetazine  
pipotiazine  
prochlorperazine  
promazine  
quetiapine  
remoxipride  
risperidone  
thiopropazate  
thiopropazine  
thioridazine  
tiotixene  
trifluoperazine  
ziprasidone  
zuclopenthixol

*Benzodiazepines and z-drugs*

alprazolam  
bromazepam  
chlordiazepoxide  
clobazam  
clonazepam  
clorazepate  
diazepam  
estazolam  
flurazepam  
ketazolam  
lorazepam  
nitrazepam  
oxazepam  
temazepam  
triazolam  
zaleplon  
zolpidem  
zopiclone

*Stimulants*

atomoxetine  
dextroamphetamine  
lisdexamfetamine

methylphenidate  
modafinil  
pemoline

*Gabapentinoids*

gabapentin  
pregabalin

*Mood stabilizers and antiepileptics*

carbamazepine  
lamotrigine  
levetiracetam  
lithium  
phenytoin  
topiramate  
valproic acid

*Muscle relaxants*

baclofen  
cyclobenzaprine  
methocarbamol
